# Supplementary material for: Label-free single-cell separation and imaging of cancer cells using an integrated microfluidic system
Source: PubMed Central journal article supplement (PMC5397835; doi:10.1038/srep46507), 2017-04-20
Supplement: srep46507-s1.pdf [file srep46507-s1.pdf]

## Supplementary Information

### Label-free single-cell separation and imaging of cancer cells using an integrated microfluidic system

Maria Antfolk\*, Soo Hyeon Kim\*, Saori Koizumi, Teruo Fujii, Thomas Laurell

\*Authors contributed equally

#### S1 The acoustic radiation force $F_{\text{rad}}$

$$F_z = -\partial_z U^{\text{rad}} = 4\pi\phi(\tilde{\kappa}, \tilde{\rho})ka^3E_{\text{ac}}\sin(2kz) \quad \text{Eq. 1}$$

$$E_{\text{ac}} = \frac{p_a^2}{4\rho_0c_0^2} \quad \phi(\tilde{\kappa}, \tilde{\rho}) = \frac{1}{3} \left[ \frac{5\tilde{\rho}-2}{2\tilde{\rho}+1} - \tilde{\kappa} \right] \quad \tilde{\rho} = \frac{\rho_p}{\rho_0} \quad \tilde{\kappa} = \frac{\kappa_p}{\kappa_0}$$

where  $F_z$  denotes the lateral acoustophoresis force,  $k$  is the wave number ( $2\pi/\lambda$ ),  $E_{\text{ac}}$  is the acoustic energy density,  $a$  - particle radius,  $\kappa_0$ ,  $\rho_0$ ,  $\kappa_p$  and  $\rho_p$  are the compressibility and density of the fluid and particle, respectively and  $\phi(\tilde{\kappa}, \tilde{\rho})$  is the acoustic contrast factor,  $z$  is the position of the particle along the wave propagation axis,  $p_a$  is the pressure amplitude,  $c_0$  is the speed of sound in the medium.

#### S2 Merged image of the EMA trapping area

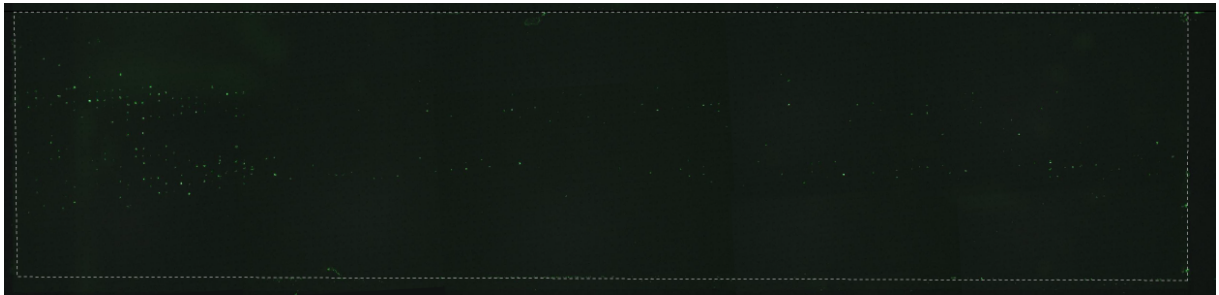

*Figure S2. Merged image of the entire trapping area where cancer cells (green) can be seen trapped in some of the wells. The sample flow direction is from left to right in the image whereas more cancer cells are seen trapped in the first part of the trap.*

#### S3 Video showing trapping of DU145 after separation.

The supplementary video shows trapping of DU145 prostate cancer cells after separation from peripheral blood mononuclear cells. The flow rate in the trap is 4  $\mu\text{L}/\text{min}$ .
